# Supplementary material for: Seasonal Regime Shift in the Viral Communities of a Permafrost Thaw Lake
Source: MDPI journal article supplement (doi:10.3390/v12111204), 2020-10-22
Supplement: s1 [file s1]

# Seasonal Regime Shift in the Viral Communities of a Permafrost Thaw Lake

Catherine Girard <sup>1,2,3,4,†</sup>, Valérie Langlois <sup>1,2,3,4</sup>, Adrien Vigneron <sup>2,3,4,5</sup>, Warwick F. Vincent <sup>2,3,4,5</sup>  
and Alexander I. Culley <sup>1,2,3,4,\*</sup>

<sup>1</sup> Département de biochimie, de microbiologie et de bio-informatique, Université Laval, Québec, QC G1V 0A6, Canada.

<sup>2</sup> Centre d'études nordiques (CEN), Université Laval, Québec, QC G1V 0A6, Canada

<sup>3</sup> Institut de biologie intégrative et des systèmes (IBIS), Université Laval, Québec, QC G1V 0A6, Canada

<sup>4</sup> Takuvik Joint International Laboratory, Université Laval, Québec, QC G1V 0A6, Canada

<sup>5</sup> Département de biologie, Université Laval, Québec, QC G1V 0A6, Canada

\* Correspondence: alexander.culley@bcm.ulaval.ca

† Current affiliation: Département des sciences fondamentales, Centre d'études nordiques, Université du Québec à Chicoutimi, Chicoutimi, QC G7H 2B1, Canada

# Supplementary Tables

**Supplementary Table S1.** Processing steps from raw sequences to vOTUs. \*VirSorter and VirFinder had 125 contigs in common (34.8% of total viral contigs).

| Processing step                  | Number      | Length range (median) (bp) |
|----------------------------------|-------------|----------------------------|
| Paired reads                     | 244,015,048 | 150                        |
| Contigs assembled                | 2,703,036   | 200 – 183,636 (404)        |
| Viral contigs                    |             |                            |
| - VirSorter contigs >10kb        |             |                            |
| o Category 1                     | 21          | 10,115 – 36,718 (16,425)   |
| o Category 2                     | 179         | 10,022 – 80,867 (19,000)   |
| o Category 4                     | 2           | 12,576 – 83,527 (48,052)   |
| o Category 5                     | 7           | 10,785 – 29,945 (14,176)   |
| - VirFinder contigs >2kb         | 275         | 10,057 – 80,867 (15,624)   |
| - Total contigs*                 | 359         | 10,022 – 83,527            |
| Viral taxa (consensus sequences) | 351         |                            |

**Supplementary Table S2.** Nonpareil viral sequence coverage estimates per sample, computed with the  $k$ -mer method. Kappa is the Nonpareil “Redundancy” value of the sample, C is the average coverage, LR is the actual sequencing effort (bp), ModelR is the Pearson’s coefficient between subsampled data and the projected model, LRstar is the estimated sequencing effort to reach the average coverage, and diversity is the Nonpareil sequence-diversity index.

| Sample | Kappa   | C         | LR (bp)   | ModelR    | LRstar (bp) | Diversity (log-bp) |
|--------|---------|-----------|-----------|-----------|-------------|--------------------|
| B1     | 0.93736 | 0.9425819 | 262265299 | 0.9995373 | 229318602   | 15.99327           |
| B2     | 0.95083 | 0.9549561 | 416579161 | 0.9997296 | 243052190   | 16.0623            |
| B3     | 0.93104 | 0.9367708 | 285704227 | 0.9990797 | 303537185   | 16.01611           |
| W1     | 0.82958 | 0.8429984 | 20110774  | 0.9997458 | 74235940    | 14.43113           |
| W2     | 0.85324 | 0.8649497 | 21632203  | 0.9994799 | 66492486    | 14.3605            |
| W3     | 0.85449 | 0.8661079 | 19966866  | 0.9997031 | 53059732    | 14.30925           |

**Supplementary Table S3.** vOTUs and viral-like contigs from SAS2A that had >90% identity over 75% of the shortest sequence when BLASTed against a viral contig database published by Paez-Espino et al. 2017.

See file *SupplementaryTableS3.xlsx*

**Supplementary Table S4.** Viral-like contigs from SAS2A that had >90% identity over 75% of the shortest sequence when BLASTed against a viral contig database published by Emerson et al. 2018.

See file *SupplementaryTableS4.xlsx*

# Supplementary Figures

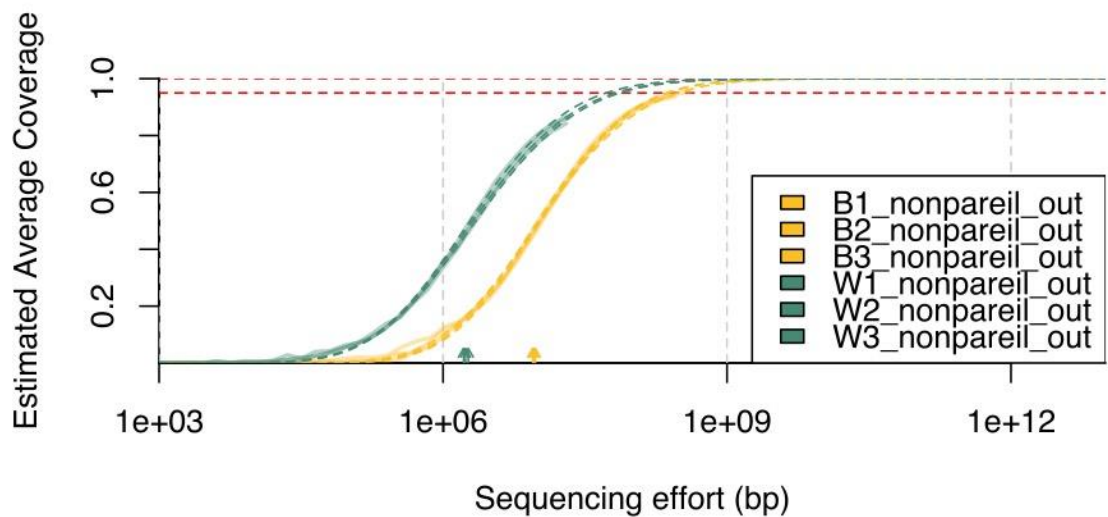

**Supplementary Figure S1.** Nonpareil coverage estimate curves for each replicate sampled computed using the *k*-mer method. Dotted lines show Nonpareil projection estimate curves, solid lines show coverage estimates from subsampling. Arrows show sequence diversity. The horizontal red dashed lines show 95 and 100 % coverage. Full data for Nonpareil estimates are presented in Supplementary Table S2.

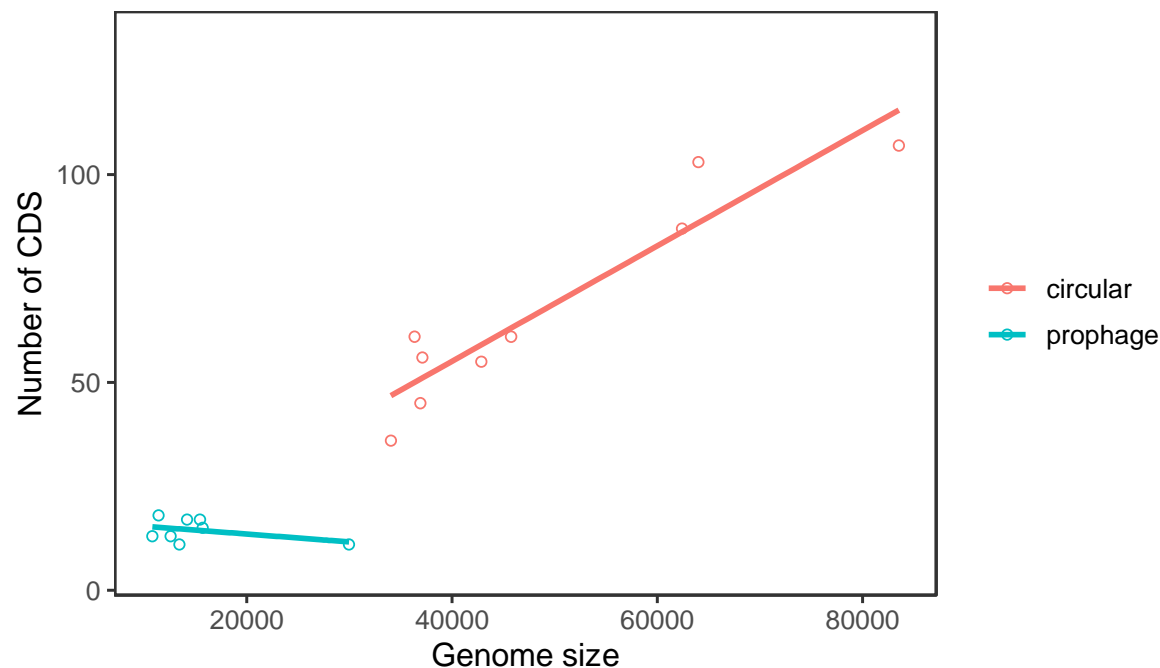

**Supplementary Figure S2.** Linear regression models between genome length and number of CDS (predicted by Prokka) in circular (red) and prophage (blue) genomes. The line shows the significant linear relationship within the circular vOTU dataset (adjusted  $R^2 = 86\%$ ,  $P = 0.0001$ ). The plot for the prophage dataset is also shown. The relationship was not significant.

**Supplementary Figure S3.** Viral proteomic tree plotted with ViPTree with 1201 reference sequences and the 9 circular UViGs from this study.

*See file SuppFigureS3.pdf*
